# Supplementary material for: Virus Host Jumping Can Be Boosted by Adaptation to a Bridge Plant Species
Source: Microorganisms. 2021 Apr 11;9(4):805. doi: 10.3390/microorganisms9040805 (PMC8070427; doi:10.3390/microorganisms9040805)
Supplement: Supplementary file 1 [file microorganisms-09-00805-s001.zip]

Archive with 8 entries (8 files):
- Supplementary Figures_100421_/Supplementary_Figure_S1_.tif
- Supplementary Figures_100421_/Supplementary_Figure_S2_.tif
- Supplementary Figures_100421_/Supplementary_Figure_S3_.tif
- Supplementary Figures_100421_/Supplementary_Figure_S4_.tif
- Supplementary Figures_100421_/Supplementary_Figure_S5_.tif
- Supplementary Figures_100421_/Supplementary_Figure_S6_.tif
- Supplementary Figures_100421_/Supplementary_Figure_S7_.tif
- Supplementary_Material_100421_.pdf
